# Supplementary material for: Osteoblast compatibility of minerals substituted hydroxyapatite reinforced poly(sorbitol sebacate adipate) nanocomposites for bone tissue application
Source: Royal Society of Chemistry journal article supplement (doi:10.1039/c5ra02419f), 2015-01-01
Supplement: c5ra02419f1.pdf [file c5ra02419f1.pdf]

## Supporting Information

### **Osteoblast compatibility of Minerals Substituted Hydroxyapatite Reinforced Poly(Sorbitol Sebacate Adipate) Nanocomposites for Bone Tissue Application<sup>†</sup>**

**Govindaraj Dharman<sup>a</sup>, Rajan Mariappan<sup>a,\*</sup>, Murugan A. Munusamy<sup>b</sup>, Bala Kumaran, M<sup>c</sup>,  
and P.T. Kalaichelvan<sup>c</sup>**

#### **Materials and methods**

##### Optimization study for the synthesis of Poly (Sorbitol Sebacate Adipate) nanocomposites by using microwave irradiation method

The same procedure followed for the synthesis of M-HAP/PSSA nanocomposites using A CEM Discover microwave synthesizer. The synthesis of M-HAP/PSSA nanocomposites was carried out under different optimized conditions. The Highlighted (in Table 1) optimized conditions are fixed for the synthesis of M-HAP/PSSA nanocomposites. Various conditions were tried to make the composite under microwave (A CEM Discover microwave synthesizer (Model No: 908010) operating at 180/264 V and 50/60 Hz with microwave power maximum level of 300 W and microwave frequency of 2455 MHz was employed for the microwave assisted experiments done in this work) irradiation method (Table 1). We have carried out the reaction under different conditions like microwave power 80-120 W (Jeronimo Blanco et al., (2009)<sup>1</sup> and time varying from 2 to 14 min. The optimization of 2 to 8 min, there is the improvement in composite formation. Above 10 min, the expected composite was obtained and it is confirmed by Scanning electron microscope and FTIR spectroscopy. Further, time increases from 10 to 14 min composites were decomposed as their original nature. Likewise microwave power increases from 60 to 120 W, composites was exactly formed at 100 W. Below 100 W and above 100 W the

composites are not formed and decomposed respectively. So, the optimized time is 10 min and power is 100 watt for the synthesis of PSSA using microwave irradiation method. This was confirmed by the repetition of the experiments as trice. The FTIR spectrum and SEM images were represented as in Figure S5, S7 and S6, S8.

Also, we have carried out the reaction under different weight percentage of ceramic addition like M-HAP content 0-10 Wt. %. The optimization of 0 to 10 Wt. %, there is great the improvement in composite formation. Above 5 Wt. %, the expected composite was obtained, and it is confirmed by Mechanical testing analyzer (CMT4104 testing machine) and Differential Scanning Calorimeter (DSC 822e, Mettler Toledo) both results are clearly discussed in result and discussions section.

**Table. S 1.**

| Optimization of time |            |            |                 |               | Optimization of power (W) |            |                 |               |
|----------------------|------------|------------|-----------------|---------------|---------------------------|------------|-----------------|---------------|
| Entry                | Composites | Time (min) | Microwave Watts | Observation   | Adipic                    | Time (min) | Microwave Watts | Observation   |
| 1                    | PSSA/M-HAP | 2          | 100             | Liquid nature | PSSA/M-HAP                | 10         | 60              | Liquid nature |
| 2                    | PSSA/M-HAP | 4          | 100             | Jelly         | PSSA/M-HAP                | 10         | 70              | Jelly         |
| 3                    | PSSA/M-HAP | 6          | 100             | Viscous       | PSSA/M-HAP                | 10         | 80              | Viscous       |
| 4                    | PSSA/M-HAP | 8          | 100             | Viscous       | PSSA/M-HAP                | 10         | 90              | High viscous  |
| 5                    | PSSA/M-HAP | 10         | 100             | Beads like    | PSSA/M-HAP                | 10         | 100             | Beads like    |
| 6                    | PSSA+M-HAP | 12         | 100             | High viscous  | PSSA/M-HAP                | 10         | 110             | Charring      |
| 7                    | PSSA+M-HAP | 14         | 100             | Charring      | PSSA/M-HAP                | 10         | 120             | Charring      |

## RESULT AND DISCUSSIONS

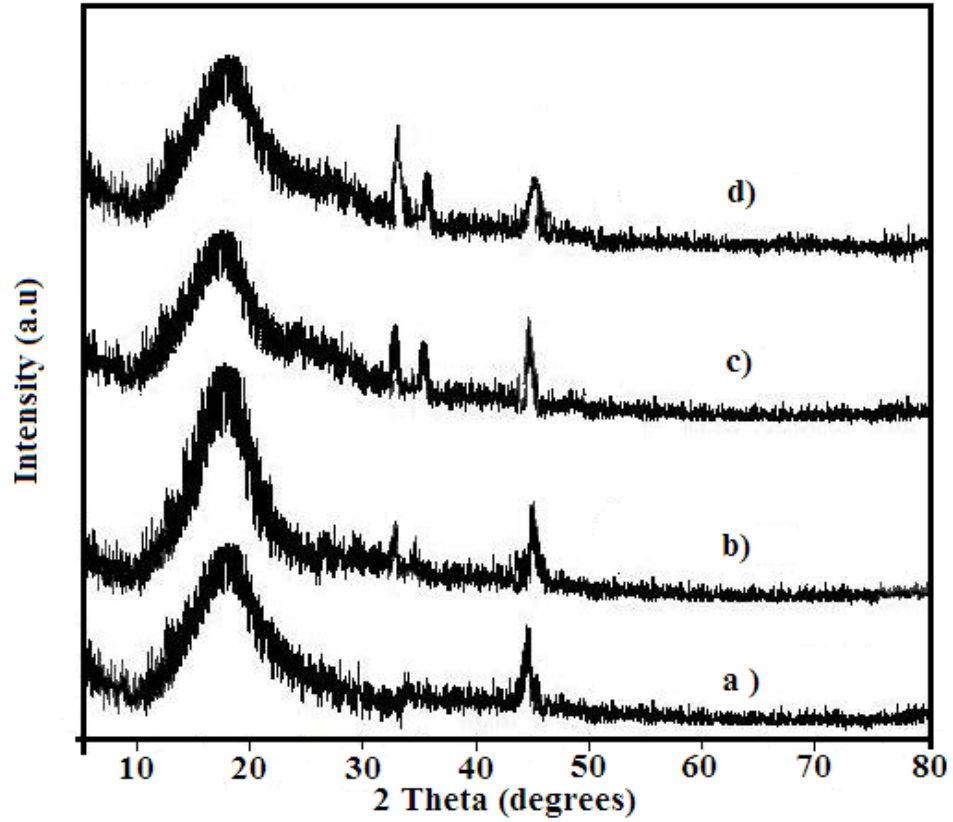

**Fig. S 1** XRD patterns of (a) pure PSSA (b) 1Wt % of M-HAP(c) 5Wt % of M-HAP and (d) 10Wt % of M-HAP

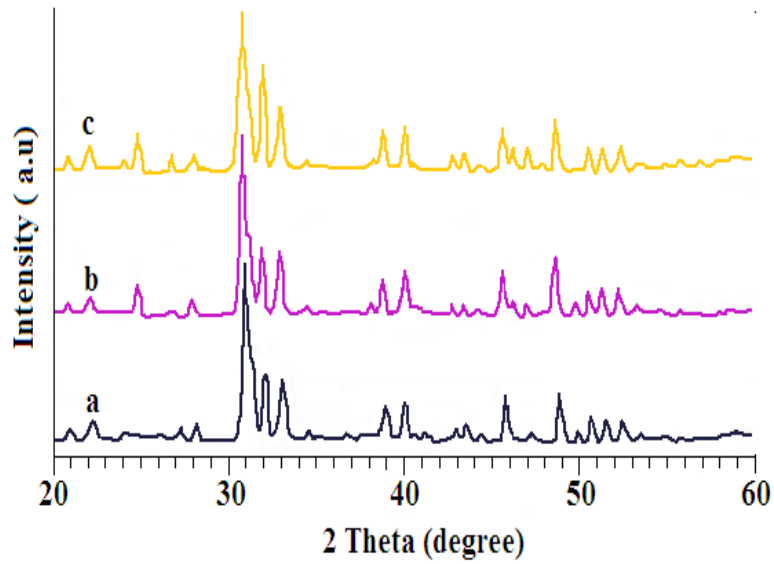

**Fig. S2.** Phase composition of the 10 Wt% of M-HAP in PSSA nanocomposite samples soaked in SBF solution for different days (a) 1, (b) 3 and (c) 7 days.

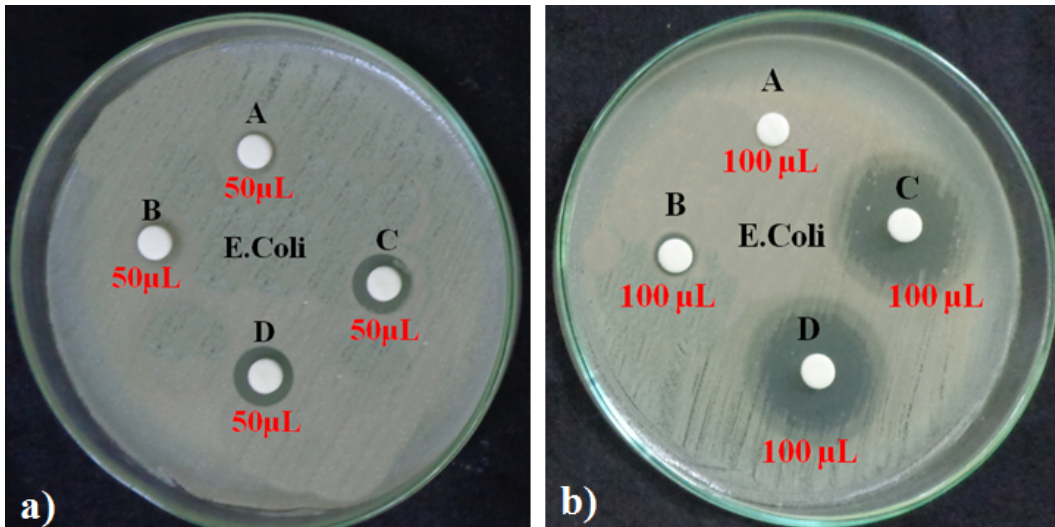

**Fig. S 3.** Antimicrobial activity of (A) PSSA, (B) HAP, (C) M-HAP and (D) 10Wt% of M-HAP in PSSA composites against E. Coli with different concentration (a) 50μL and (b) 100μL.

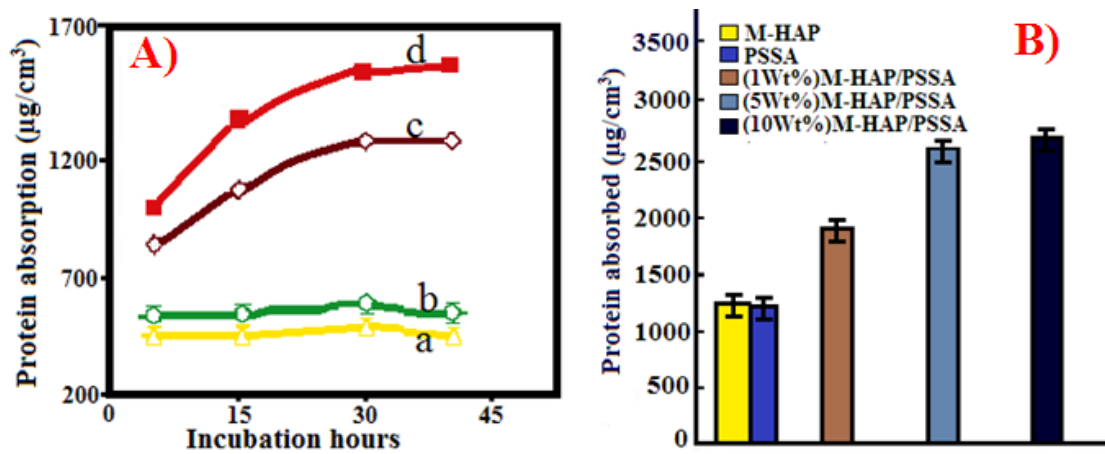

**Fig. S 4** Protein adsorption of (A) M-HAP(a), PSSA(b), 1Wt% of M-HAP (b), 5Wt% of M-HAP (c), 10Wt% of M-HAP (d); (B) bar diagram

**Table S 2.** Mechanical and thermal properties of M-HAP/PSSA composites.

| <b>M-HAP (%)</b> | <b>Tensile strength (MPa)</b> | <b>Tensile Modulus (MPa)</b> | <b>Elongation at break (%)</b> | <b>Tg (°C)</b> |
|------------------|-------------------------------|------------------------------|--------------------------------|----------------|
| 0                | 16.10 ± 1.53                  | 613.76 ± 70.10               | 49.10 ± 3.90                   | 39.92          |
| 1                | 18.51 ± 1.79                  | 680.75 ± 96.25               | 32.76 ± 3.45                   | 40.91          |
| 5                | 20.23 ± 3.08                  | 890.60 ± 140.80              | 25.08 ± 2.50                   | 41.52          |
| 10               | 22.10 ± 2.69                  | 1058.40 ± 114.15             | 9.12 ± 2.25                    | 42.70          |



## REPRODUCIBILITY RESULTS

### Figures

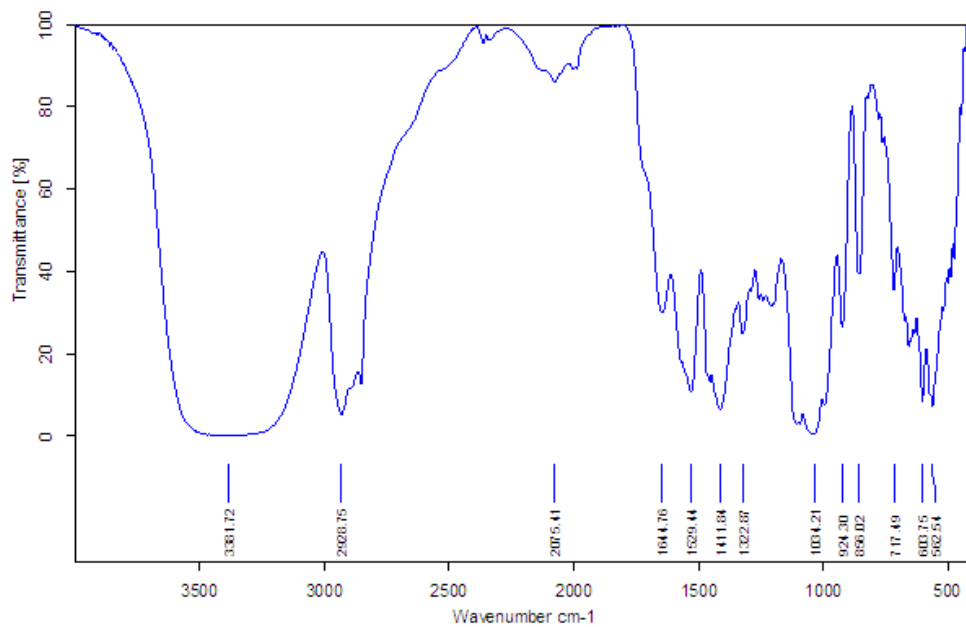

**Fig. S5.** IR spectra of 10 Wt% of M-HAP in PSSA post polymer

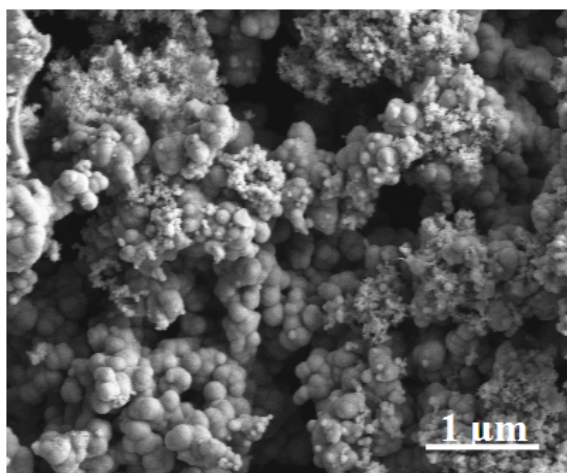

**Fig. S6.** SEM image of 10 Wt% of M-HAP in PSSA post polymer

Statistical analysis results of Poly (Sorbitol Sebacate Adipate) nanocomposites synthesis by using microwave irradiation method

Reproducibility results

FTIR Results

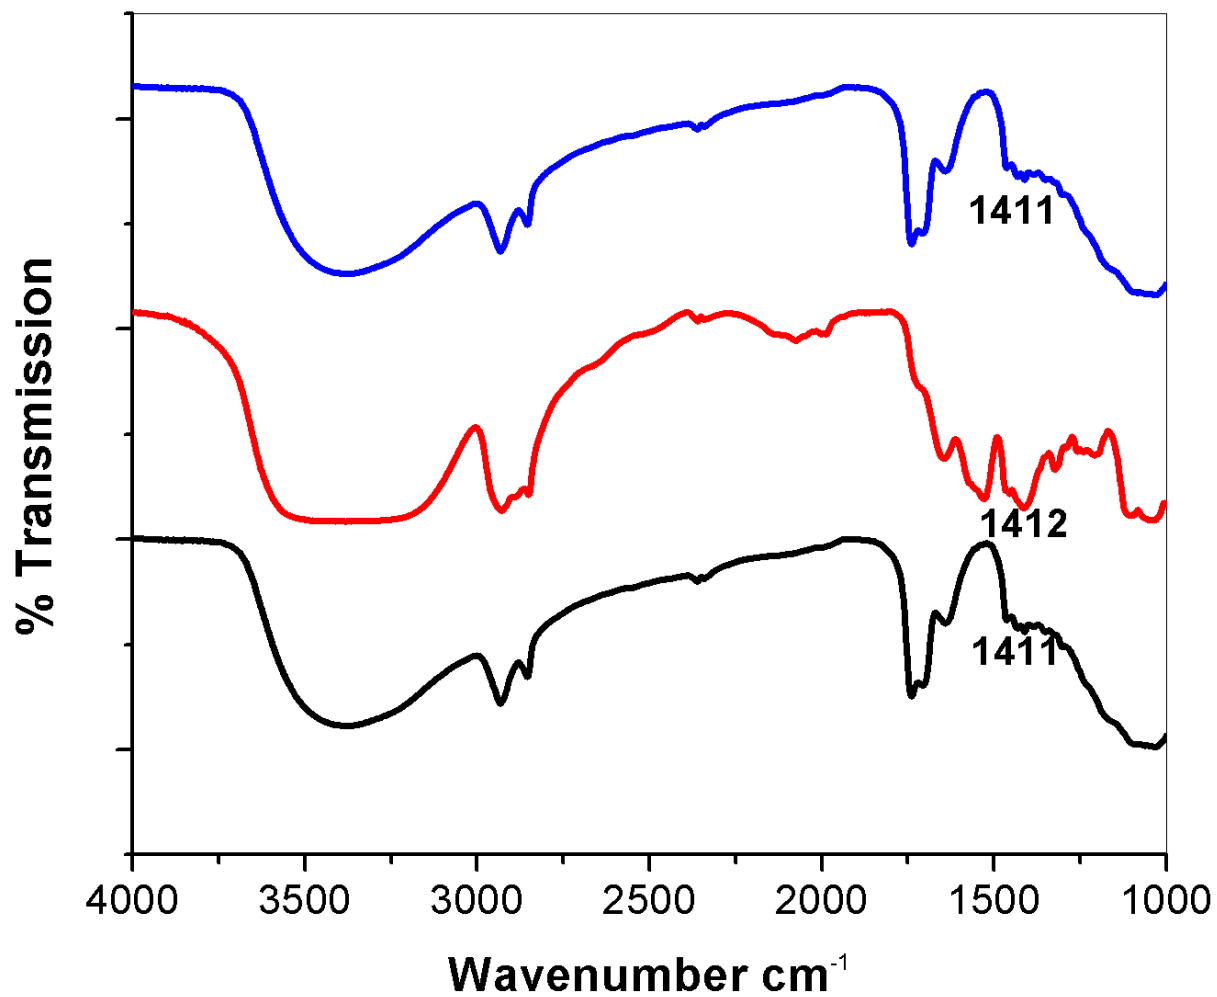

Fig.S7 IR spectra of 10 Wt% of M-HAP in PSSA post polymer.

## SEM Results

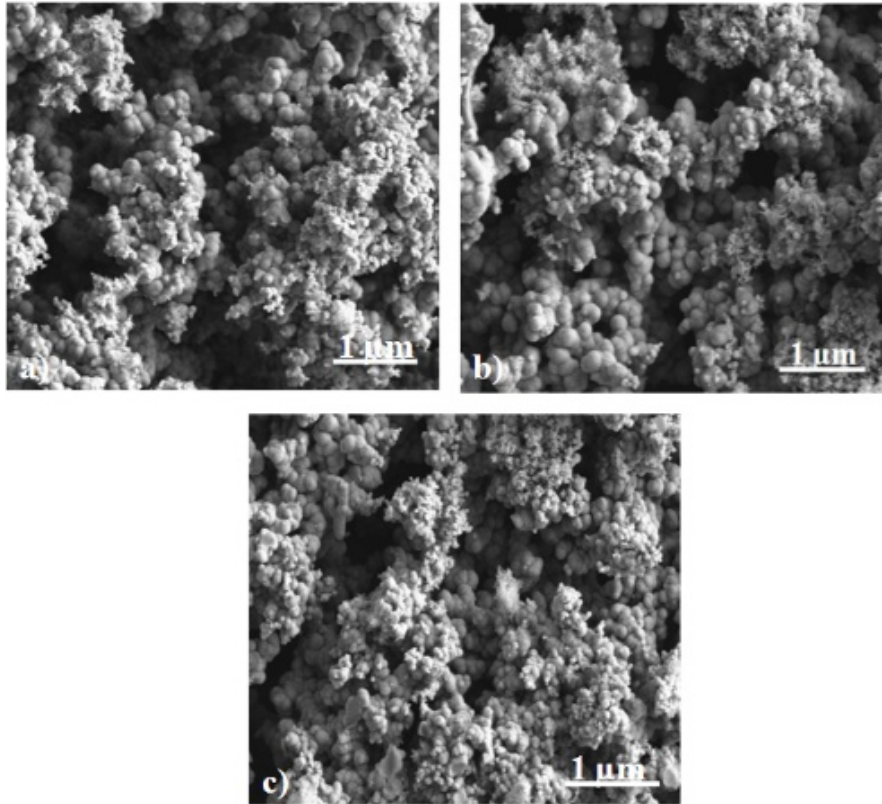

**Fig.S8** SEM results of 10 Wt% of M-HAP in PSSA post polymer.

## Reference

1. Irene R. De'gano, Lluís Quintana, Marta Vilalta, David Horna, Nuria Rubio, Salvador Borros, Carlos Semino, Jerónimo Blanco, *Biomaterials* (2009), 30, 1156–1165.
